# Supplementary material
Source: publisher figshare collection journal article supplement (https://gsajournals.figshare.com/ndownloader/files/25834001)
Supplement: Supplementary file 1 [file 25834001]

|  | v. 5 assembly | v. 4 assembly |
| --- | --- | --- |
| Complete BUSCOs (C) | 3507 | 3314 |
| Complete and single-copy BUSCOs (S) | 3418 | 3226 |
| Complete and duplicated BUSCOs (D) | 89 | 88 |
| Fragmented BUSCOs (F) | 14 | 108 |
| Missing BUSCOs (M) | 119 | 218 |
| Total BUSCO groups searched | 3640 | 3640 |
|  |  |  |

**Table S3. Improvement in the number of BUSCO genes in the new v. 5 genome assembly.**
